# Supplementary material
Source: publisher figshare collection journal article supplement (https://springernature.figshare.com/ndownloader/files/37796745)
Supplement: Supplementary file [file 37796745]

Exosomal DNAJB11 promotes the development of pancreatic cancer by activating EGFR/MAPK signaling pathway and regulating Endoplasmic Reticulum Stress  
Peng Liu<sup>1</sup>, Lingming Kong<sup>1</sup>, Fuqiang Zu<sup>1</sup>, Hui Chen<sup>1</sup>,Xiaoli Yin<sup>2,\*</sup>, Xiaodong Tan<sup>1,\*</sup>

1 Department of general surgery, Shengjing Hospital, China Medical University, Shenyang 110004, China  
2 Department of Radiology, Shengjing Hospital of China Medical University, Shenyang 110004, China  
\*Corresponding Author: Xiaodong Tan, 1st Department of general surgery, Shengjing Hospital, China Medical University, Shenyang 110004, China. E-mail:tanxdcmu@163.com.  
Xiaoli Yin: Department of Radiology, Shengjing Hospital of China Medical University, Shenyang 110004, China, E-mail: yinx1057728@163.com.  
These authors have contributed equally to this work.

Title: the information of Purified exosomes

| Patient number | Admission diagnosis       | Admission number | Age | Gender | TNM staging | Protein level by WB (ng/ul) |
|----------------|---------------------------|------------------|-----|--------|-------------|-----------------------------|
| 1              | Pancreatic cancer         | 2210150          | 45  | Female | T3N1M0      | 6446                        |
| 2              | Pancreatic cancer         | 2218518          | 73  | Male   | T3N0M0      | 4563                        |
| 3              | Pancreatic cancer         | 2220123          | 51  | Female | T1N1M0      | 5313                        |
| 4              | Pancreatic cancer         | 2220529          | 56  | Female | T3N1M0      | 4155                        |
| 5              | Pancreatic cancer         | 2284331          | 45  | Male   | T3N0M0      | 4705                        |
| 6              | Pancreatic cancer         | 1282143          | 50  | Male   | T2N1M0      | 4321                        |
| 1              | Benign pancreatic disease | 2214144          | 42  | Female |             | 5980                        |
| 2              | Benign pancreatic disease | 2213994          | 30  | Male   |             | 4813                        |
| 3              | Benign pancreatic disease | 2215704          | 78  | Female |             | 5080                        |
| 4              | Benign pancreatic disease | 2217481          | 63  | Male   |             | 5480                        |
| 5              | Benign pancreatic disease | 2167617          | 52  | Male   |             | 4989                        |
| 6              | Benign pancreatic disease | 2268805          | 36  | Male   |             | 5243                        |
| 1              | Healthy people            |                  | 39  | Female |             | 1746                        |
| 2              | Healthy people            |                  | 49  | Female |             | 2771                        |
| 3              | Healthy people            |                  | 63  | Male   |             | 3013                        |
| 4              | Healthy people            |                  | 65  | Female |             | 2631                        |
| 5              | Healthy people            |                  | 44  | Male   |             | 2738                        |
| 6              | Healthy people            |                  | 38  | Female |             | 2462                        |

Exosomal DNAJB11 promotes the development of pancreatic cancer by activating EGFR/MAPK signaling pathway and regulating Endoplasmic Reticulum Stress  
Peng Liu<sup>1</sup>, Lingming Kong<sup>1</sup>, Fuqiang Zul, Hui Chen<sup>1</sup>,Xiaoli Yin<sup>2,\*</sup>, Xiaodong Tan<sup>1,\*</sup>

1 Department of general surgery, Shengjing Hospital, China Medical University, Shenyang 110004, China  
2 Department of Radiology, Shengjing Hospital of China Medical University, Shenyang 110004, China  
\*Corresponding Author: Xiaodong Tan, 1st Department of general surgery, Shengjing Hospital, China Medical University, Shenyang 110004, China. E-mail:tanxdcmu@163.com.  
Xiaoli Yin: Department of Radiology, Shengjing Hospital of China Medical University, Shenyang 110004, China, E-mail: yinxl057728@163.com.  
These authors have contributed equally to this work.

Title: the information of malignant pancreatic cancer

| Patient number | Admission number | Age | Gender | Admission diagnosis | TNM staging | CA19-9 (U/ml) | 450 OD value |
|----------------|------------------|-----|--------|---------------------|-------------|---------------|--------------|
| 1              | 2210150          | 45  | Female | Pancreatic cancer   | T3N1M0      | 631.9         | 1.520        |
| 2              | 2218518          | 73  | Male   | Pancreatic cancer   | T3N0M0      | >1000         | 0.695        |
| 3              | 2220123          | 51  | Female | Pancreatic cancer   | T1N1M0      | 22.73         | 1.507        |
| 4              | 2220529          | 56  | Female | Pancreatic cancer   | T3N1M0      | 39.98         | 1.498        |
| 5              | 2220833          | 60  | Female | Pancreatic cancer   | T3N2M0      | >1000         | 1.590        |
| 6              | 2224117          | 53  | Female | Pancreatic cancer   | T2N0M0      | 73.33         | 1.728        |
| 7              | 2223982          | 59  | Male   | Pancreatic cancer   | T3N1M0      | 51.82         | 1.224        |
| 8              | 1282143          | 50  | Male   | Pancreatic cancer   | T2N1M0      | 899.1         | 1.308        |
| 9              | 2256684          | 51  | Male   | Pancreatic cancer   | T3N0M0      | 131.7         | 1.250        |
| 10             | 2245214          | 65  | Male   | Pancreatic cancer   | T2N0M0      | 200.1         | 0.184        |
| 11             | 2260900          | 67  | Male   | Pancreatic cancer   | T2N0M0      | 241.9         | 1.681        |
| 12             | 2258438          | 57  | Male   | Pancreatic cancer   | T4N0M0      | 185.5         | 1.179        |
| 13             | 2254405          | 68  | Male   | Pancreatic cancer   | T2N0M0      | 5.02          | 0.843        |
| 14             | 2246083          | 52  | Female | Ampullar cancer     | T2N2M0      | 43.76         | 0.860        |
| 15             | 2275845          | 62  | Female | Pancreatic cancer   | T3N0M0      | 0.622         | 1.229        |
| 16             | 2280528          | 72  | Female | Pancreatic cancer   | T3N2M0      | 420.5         | 1.396        |
| 17             | 2283722          | 52  | Male   | Pancreatic cancer   | T2N0M0      | 59.92         | 0.174        |
| 18             | 2280528          | 73  | Female | Pancreatic cancer   | T2N1M0      | 420. 5        | 0.903        |
| 19             | 2284051          | 59  | Male   | Pancreatic cancer   | T2N0M0      | 822. 6        | 1.416        |
| 20             | 2284331          | 45  | Male   | Pancreatic cancer   | T3N0M0      | 86. 41        | 1.223        |
| 21             | 2284479          | 60  | Female | Pancreatic cancer   | T2N0M0      | 52. 57        | 0.745        |
| 22             | 2235934          | 46  | Male   | Pancreatic cancer   | T4N0M0      | 5. 81         | 1.349        |
| 23             | 2245214          | 65  | Male   | Pancreatic cancer   | T2N0M0      | 200. 1        | 1.816        |
| 24             | 2285687          | 63  | Female | Pancreatic cancer   | T2N0M0      | 88. 88        | 0.847        |
| 25             | 2289258          | 61  | Female | Pancreatic cancer   | T2N0M0      | 118. 1        | 0.950        |
| 26             | 2291064          | 57  | Female | Pancreatic cancer   | T2N0M0      | 0. 966        | 0.594        |
| 27             | 2291087          | 63  | Female | Pancreatic cancer   | T2N0M0      | 12. 77        | 0.978        |
| 28             | 2335529          | 78  | Female | Pancreatic cancer   | T2N0M0      | 28. 09        | 2.342        |
| 29             | 2945842          | 66  | Female | Pancreatic cancer   | T2N0M0      | 274. 7        | 1.059        |
| 30             | 2337173          | 58  | Male   | Pancreatic cancer   | T2N0M1      | 476. 2        | 1.134        |
| 31             | 2337607          | 49  | Male   | Pancreatic cancer   | T4N1M1      | 361. 7        | 1.667        |

Exosomal DNAJB11 promotes the development of pancreatic cancer by activating EGFR/MAPK signaling pathway and regulating Endoplasmic Reticulum Stress  
Peng Liu<sup>1</sup>, Lingming Kong<sup>1</sup>, Fuqiang Zul, Hui Chen<sup>1</sup>,Xiaoli Yin<sup>2,\*</sup>, Xiaodong Tan<sup>1,\*</sup>

1 Department of general surgery, Shengjing Hospital, China Medical University, Shenyang 110004, China  
2 Department of Radiology, Shengjing Hospital of China Medical University, Shenyang 110004, China  
\*Corresponding Author: Xiaodong Tan, 1st Department of general surgery, Shengjing Hospital, China Medical University, Shenyang 110004, China. E-mail:tanxdcmu@163.com.  
Xiaoli Yin: Department of Radiology, Shengjing Hospital of China Medical University, Shenyang 110004, China, E-mail: yinx1057728@163.com.  
These authors have contributed equally to this work.

Title: the information of benign pancreatic disease

| Patient number | Admission number | Age | Gender | Admission diagnosis    | CA19-9 (U/ml) | 450 OD value |
|----------------|------------------|-----|--------|------------------------|---------------|--------------|
| 1              | 2223931          | 69  | Male   | Pancreatic cystadenoma | 8.7           | 0.6623       |
| 2              | 2224073          | 65  | Female | Pancreatic cystadenoma | 56.4          | 0.6673       |
| 3              | 2243316          | 39  | Female | Pancreatic mass        | 9.2           | 0.6093       |
| 4              | 2259781          | 34  | Female | Pancreatic mass        | 3.3           | 1.6853       |
| 5              | 2263279          | 58  | Male   | Pancreatic mass        | 10.9          | 0.6183       |
| 6              | 2263806          | 34  | Female | Pancreatic cystadenoma | 11.2          | 0.7923       |
| 7              | 2261264          | 58  | Male   | Pancreatic cystadenoma | 17.6          | 1.1833       |
| 8              | 2265117          | 32  | Female | Pancreatic cystadenoma | 7.7           | 0.7653       |
| 9              | 2268278          | 69  | Female | Pancreatic mass        | 9.4           | 0.6363       |
| 10             | 2268772          | 65  | Female | Pancreatic mass        | 12            | 1.7683       |
| 11             | 2277987          | 34  | Female | Pancreatic mass        | 9.7           | 0.9233       |
| 12             | 2271477          | 45  | Female | Pancreatic mass        | 7.9           | 0.8843       |
| 13             | 2269807          | 67  | Male   | Pancreatic cystadenoma | 14.9          | 0.7943       |
| 14             | 2280627          | 52  | Female | Pancreatic cystadenoma | 6.3           | 0.9483       |
| 15             | 2285948          | 49  | Female | Pancreatic cystadenoma | 16.27         | 0.7293       |
| 16             | 2010616          | 58  | Female | Pancreatic mass        | 46.09         | 0.6143       |
| 17             | 2022268          | 66  | Female | Pancreatic cystadenoma | 6.31          | 0.6643       |
| 18             | 2214144          | 42  | Female | Chronic pancreatitis   | 7.2           | 0.6923       |
| 19             | 2213994          | 30  | Male   | Chronic pancreatitis   | 4.3           | 0.8043       |
| 20             | 2215704          | 78  | Female | Acute pancreatitis     | 206.5         | 1.2633       |
| 21             | 2217481          | 63  | Male   | Acute pancreatitis     | 18.2          | 0.9663       |
| 22             | 2167617          | 52  | Male   | Chronic pancreatitis   | 14.8          | 0.5873       |
| 23             | 2268805          | 36  | Male   | Biliary pancreatitis   | 12            | 1.7303       |
| 24             | 2280685          | 56  | Male   | Acute pancreatitis     | 157.3         | 0.9823       |
| 25             | 2227408          | 61  | Male   | Acute pancreatitis     | 11.5          | 0.7893       |
| 26             | 2284726          | 62  | Male   | Acute pancreatitis     | 6.9           | 0.7843       |
| 27             | 1916883          | 61  | Male   | Chronic pancreatitis   | 70.11         | 0.5603       |
| 28             | 2015888          | 48  | Male   | Biliary pancreatitis   | 22. 26        | 0.6133       |

Exosomal DNAJB11 promotes the development of pancreatic cancer by activating EGFR/MAPK signaling pathway and regulating Endoplasmic Reticulum Stress  
Peng Liu<sup>1</sup>, Lingming Kong<sup>1</sup>, Fuqiang Zu<sup>1</sup>, Hui Chen<sup>1</sup>,Xiaoli Yin<sup>2,\*</sup>, Xiaodong Tan<sup>1,\*</sup>

1 Department of general surgery, Shengjing Hospital, China Medical University, Shenyang 110004, China  
2 Department of Radiology, Shengjing Hospital of China Medical University, Shenyang 110004, China  
\*Corresponding Author: Xiaodong Tan, 1st Department of general surgery, Shengjing Hospital, China Medical University, Shenyang 110004, China. E-mail:tanxdcmu@163.com.  
Xiaoli Yin: Department of Radiology, Shengjing Hospital of China Medical University, Shenyang 110004, China, E-mail: yinx1057728@163.com.  
These authors have contributed equally to this work.

Title: the information of healthy control

| Number | Gender | Age | 450 OD value |
|--------|--------|-----|--------------|
| 1      | Female | 22  | 0.438        |
| 2      | Female | 39  | 0.518        |
| 3      | Female | 49  | 0.353        |
| 4      | Male   | 63  | 0.372        |
| 5      | Female | 65  | 0.598        |
| 6      | Male   | 44  | 0.642        |
| 7      | Female | 38  | 0.643        |
| 8      | Female | 51  | 0.302        |
| 9      | Female | 64  | 0.382        |
| 10     | Male   | 26  | 0.425        |
| 11     | Female | 23  | 1.401        |
| 12     | Male   | 22  | 0.238        |
| 13     | Male   | 28  | 0.419        |
| 14     | Male   | 30  | 1.395        |
| 15     | Male   | 24  | 0.349        |
| 16     | Male   | 66  | 1.529        |
| 17     | Female | 51  | 0.384        |
| 18     | Female | 54  | 0.330        |
| 19     | Female | 54  | 0.238        |
| 20     | Female | 33  | 0.305        |
| 21     | Female | 59  | 0.389        |
| 22     | Male   | 31  | 0.192        |
| 23     | Female | 37  | 0.343        |
| 24     | Female | 36  | 0.329        |
| 25     | Male   | 58  | 1.337        |
| 26     | Male   | 63  | 1.362        |
| 27     | Male   | 76  | 0.550        |
| 28     | Male   | 51  | 0.502        |
| 29     | Male   | 60  | 1.186        |
| 30     | Female | 37  | 0.902        |
| 31     | Female | 32  | 0.985        |
